# Supplementary material for: Large but decreasing effect of ozone on the European carbon sink
Source: Copernicus journal article supplement (doi:10.5194/bg-2017-409), 2017-10-11
Supplement: Supplementary file 1 [file bg-2017-409-supplement.pdf]

## 1 Supplementary Information

2

### 3 S1 Fractional cover of JULES PFTs

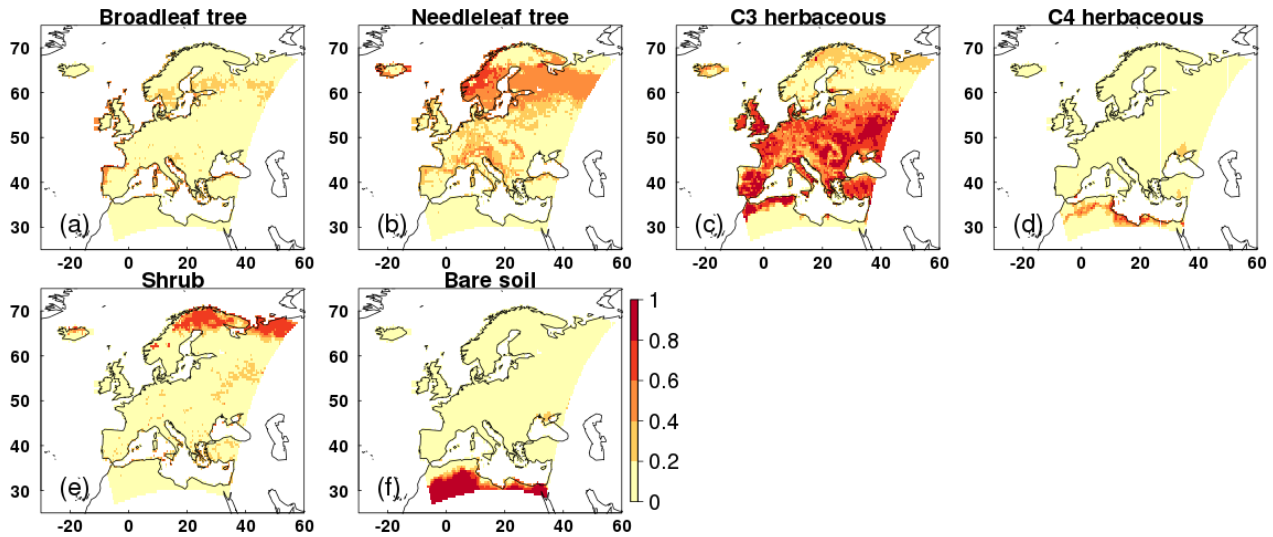

4

5 **Figure S1.** Fractional cover of each JULES PFT and bare soil at 0.5° x 0.5° resolution.

6

7

### 8 S2 Calibration of O<sub>3</sub> uptake model for European vegetation

9

10 Here we use the latest literature on O<sub>3</sub> dose-response relationships derived from observed field data across Europe (CLRTAP, 2017)  
11 to calculate the key PFT-specific parameters. Data comes from the UNECE CLRTAP (2017) report which is a synthesis of the latest  
12 peer reviewed literature, collated by a panel of experts and so is considered the state-of-the art knowledge. Each PFT was calibrated  
13 for a high and low plant O<sub>3</sub> sensitivity to account for uncertainty in the sensitivity of different plant species to O<sub>3</sub>, using the approach  
14 of Sitch *et al.*, (2007). In addition, where possible owing to available data, a distinction was made for Mediterranean regions. This  
15 was because the work of Büker *et al.* (2015) showed that different O<sub>3</sub> dose-response relationships are needed to describe the O<sub>3</sub>  
16 sensitivity of dominant Mediterranean trees. For the C<sub>3</sub> herbaceous PFT – the dominant land cover type across the European domain  
17 in this study (Fig. S1) - the O<sub>3</sub> sensitivity was calibrated against observations for wheat to give a representation of agricultural  
18 regions (high plant O<sub>3</sub> sensitivity), versus natural grassland (low plant O<sub>3</sub> sensitivity), with a separate function for Mediterranean  
19 grasslands (low plant O<sub>3</sub> sensitivity), all taken from CLRTAP (2017). Tree/shrub PFTs were calibrated against observed O<sub>3</sub> dose-  
20 response functions for the high plant O<sub>3</sub> sensitivity (BT = Birch/Beech, BT-Med = deciduous oaks, NT = Norway spruce, shrub =  
21 Birch/Beech) all from CLRTAP (2017). The low plant O<sub>3</sub> sensitivity functions for trees/shrubs were calibrated as being 20 % less  
22 sensitive based on the difference in sensitivity between high and low sensitive tree species in the Karlsson *et al.* (2007) study. Due  
23 to limitations in data availability, the shrub parameterisation uses the observed dose-response functions for broadleaf trees.  
24 Similarly, the parameterisation for C<sub>4</sub> herbaceous uses the observed dose-responses for C<sub>3</sub> herbaceous, however the fractional cover  
25 of C<sub>4</sub> herbs across Europe is low (Fig. S1), so this assumption affects a very small percentage of land cover. See Table S1 and Figure  
26 S2.

28 To calibrate the O<sub>3</sub> uptake model for the fast carbon fluxes, e.g. net primary productivity (NPP), JULES was run across Europe  
29 forced using the WFDEI observational climate dataset (Weedon, 2013) at 0.5° X 0.5° spatial and three hour temporal resolution.  
30 JULES uses interpolation to disaggregate the forcing data down from 3 hours to an hourly model time step. The model was spun-  
31 up over the period 1979 to 1999 with a fixed atmospheric CO<sub>2</sub> concentration of 368.33 ppm (1999 value from Mauna Loa  
32 observations, (Tans and Keeling)). Zero tropospheric ozone concentration was assumed for the control simulation, for the  
33 simulations with O<sub>3</sub>, spin-up used spatially explicit fields of present day O<sub>3</sub> concentration produced using the UK Chemistry and  
34 Aerosol (UKCA) model with standard chemistry from the run evaluated by O'Connor et al. (2014). A fixed land cover map was  
35 used based on IGBP (International Geosphere-Biosphere Programme) land cover classes (IGBP-DIS), therefore as the vegetation  
36 distribution was fixed and the calibration was not looking at carbon stores, a short spin-up was adequate to equilibrate soil  
37 temperature and soil moisture. JULES was then run for year 2000 with a corresponding CO<sub>2</sub> concentration of 369.52 ppm (from  
38 Mauna Loa observations, (Tans and Keeling)) and monthly fields of spatially explicit tropospheric O<sub>3</sub> (O'Connor et al., 2014) as  
39 necessary.

40

41 Calibration was performed using four simulations: with i) zero tropospheric O<sub>3</sub> concentration, this was the control simulation  
42 (NPP\_control), ii) tropospheric O<sub>3</sub> at current ambient concentration (NPP\_O3), iii) ambient +20 ppb (NPP\_O3+20) and iv) ambient  
43 +40 ppb (NPP\_O3+40). The different O<sub>3</sub> simulations (i.e. ambient, ambient + 20 and ambient + 40 ppb) were used to capture the  
44 range of O<sub>3</sub> conditions used in constructing the observed O<sub>3</sub> dose-response relationships deployed for calibration, often these had  
45 been constructed under artificially manipulated conditions of ambient + 40 ppb O<sub>3</sub> for example. For each simulation with O<sub>3</sub>, JULES  
46 used the observed PFT-specific threshold value of O<sub>3</sub> uptake (i.e. parameter  $F_{O_3crit}$ ), and an initial estimate of the parameter 'a'  
47 (equation 2). For each PFT and each simulation, hourly estimates of NPP and O<sub>3</sub> uptake for the top sunlit leaf in excess of  $F_{O_3crit}$   
48 were accumulated over a PFT dependent accumulation (i.e. ~6 months for broadleaf trees and shrubs, all year for needle leaf trees,  
49 and ~3 months for herbaceous species, through the growing season). Change in total NPP over the accumulation period  
50 (NPP\_O3/+20/+40 divided by NPP\_control) was calculated for each O<sub>3</sub> simulation and plotted against the cumulative uptake of O<sub>3</sub>  
51 over the same period. The linear regression of this relationship was calculated, and slope and intercept compared against the observed  
52 dose-response relationships. Values of the parameter 'a' were adjusted, and the procedure repeated until the linear regression through  
53 the simulation points matched that of the observations (Fig. S2). JULES is run to be as comparable as possible to the dose-based O<sub>3</sub>  
54 risk indicator used in CLRTAP (2017), as only the O<sub>3</sub> flux to top of canopy sunlit leaves is accumulated (i.e. the O<sub>3</sub> flux per  
55 projected leaf area). See Table S1 Figure S2.

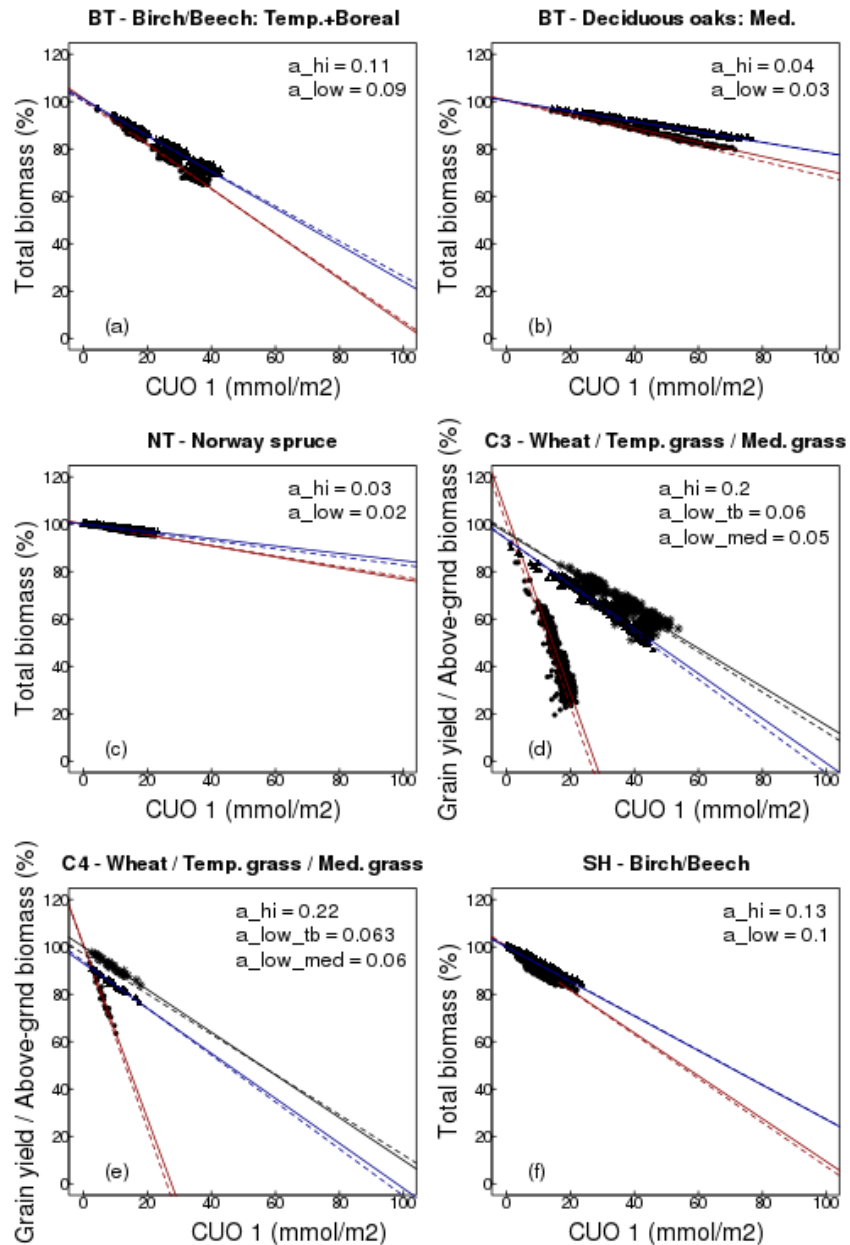

56

57 **Figure S2.** Calibration of JULES for O<sub>3</sub> impacts on plant productivity for each JULES PFT ; a) broadleaf tree – temperate/boreal,  
 58 b) broadleaf tree Mediterranean, c) Needle leaf tree, d) C<sub>3</sub> herbaceous (split into temperate/boreal and Mediterranean for the natural  
 59 grasslands), e) C<sub>4</sub> herbaceous (split into temperate/boreal and Mediterranean for the natural grasslands), and f) shrub. High (red)  
 60 and low (blue) plant O<sub>3</sub> sensitivities are shown. For the herbaceous PFTs the low sensitivity calibration is separate for Mediterranean  
 61 regions (black). The solid line is the regression line through the modelled points, the dashed line is the regression line from the  
 62 observed dose-response relationship.

63

64

65

66

67

68

|                                        | High Sensitivity              |                                                  |                                                   |                                                   |                               |
|----------------------------------------|-------------------------------|--------------------------------------------------|---------------------------------------------------|---------------------------------------------------|-------------------------------|
|                                        | BT                            | NT                                               | C3                                                | C4                                                | SH                            |
| $F_{O_3crit}$ (nmol/m <sup>2</sup> /s) | 1.00                          | 1.00                                             | 1.00                                              | 1.00                                              | 1.00                          |
| $a$ (mmol/m <sup>2</sup> )             | 0.110                         | 0.030                                            | 0.200                                             | 0.220                                             | 0.130                         |
| Function                               | Birch/Beech:<br>y=100.2-0.93x | Norway spruce:<br>y=99.8-0.22x                   | Wheat:<br>y=100.3-3.85x                           | Wheat:<br>y=100.3-3.85x                           | Birch/Beech:<br>y=100.2-0.93x |
| $dq_{crit}$ (kg kg <sup>-1</sup> )     | 0.09                          | 0.06                                             | 0.1                                               | 0.075                                             | 0.1                           |
| $f_0$                                  | 0.875                         | 0.875                                            | 0.9                                               | 0.8                                               | 0.9                           |
| $g_1$ (kPa <sup>0.5</sup> )            | 3.22                          | 2.22                                             | 5.56                                              | 1.1                                               | 2.24                          |
|                                        | Low Sensitivity               |                                                  |                                                   |                                                   |                               |
|                                        | BT                            | NT                                               | C3                                                | C4                                                | SH                            |
| $F_{O_3crit}$ (nmol/m <sup>2</sup> /s) | 1.00                          | 1.00                                             | 1.00                                              | 1.00                                              | 1.00                          |
| $a$ (mmol/m <sup>2</sup> )             | 0.090                         | 0.020                                            | 0.060                                             | 0.063                                             | 0.100                         |
| Function                               | Birch/Beech:<br>y=100.2-0.74x | Norway spruce:<br>y=99.8-0.17x                   | Temperate perennial<br>grassland:<br>y=93.9-0.99x | Temperate perennial<br>grassland:<br>y=93.9-0.99x | Birch/Beech:<br>y=100.2-0.74x |
|                                        | High Sensitivity              |                                                  |                                                   |                                                   |                               |
|                                        | BT - Med.                     |                                                  |                                                   |                                                   |                               |
| $F_{O_3crit}$ (nmol/m <sup>2</sup> /s) | 1.00                          |                                                  |                                                   |                                                   |                               |
| $a$ (mmol/m <sup>2</sup> )             | 0.040                         |                                                  |                                                   |                                                   |                               |
| Function                               | Dec. Oaks:<br>y=100.3-0.32x   |                                                  |                                                   |                                                   |                               |
|                                        | Low Sensitivity               |                                                  |                                                   |                                                   |                               |
|                                        | BT - Med.                     | C3 - Med.                                        | C4 - Med.                                         |                                                   |                               |
| $F_{O_3crit}$ (nmol/m <sup>2</sup> /s) | 1.00                          | 1.00                                             | 1.00                                              |                                                   |                               |
| $a$ (mmol/m <sup>2</sup> )             | 0.030                         | 0.050                                            | 0.060                                             |                                                   |                               |
| Function                               | Dec. Oaks:<br>y=100.3-0.22x   | Mediterranean<br>annual pasture:<br>y=97.1-0.85x | Mediterranean<br>annual pasture:<br>y=97.1-0.85x  |                                                   |                               |

**Table S1.** PFT-specific parameter values used in the O<sub>3</sub> uptake and g<sub>s</sub> formulation in JULES.  $F_{O_3crit}$  is the critical O<sub>3</sub> threshold above which damage occurs,  $a$  determines the reduction in photosynthesis with O<sub>3</sub> exposure, ‘function’ shows the regression equation for the observed functions (x is  $F_{O_3crit}$ ),  $dq_{crit}$  (kg kg<sup>-1</sup>) is a PFT specific parameters representing the critical humidity deficit at the leaf surface (used in the default JULES g<sub>s</sub> model),  $f_0$  is the leaf internal to atmospheric CO<sub>2</sub> ratio ( $c_i/c_a$ ) at the leaf specific humidity deficit (also used in the default JULES g<sub>s</sub> model), and  $g_1$  is the PFT specific parameter of the Medlyn *et al.*, (2011) g<sub>s</sub> model. The parameters  $dq_{crit}$ ,  $f_0$  and  $g_1$  vary by PFT, but not by O<sub>3</sub> sensitivity so are only shown once here.

69

70

71

72

73

74

75

76

77

78

79

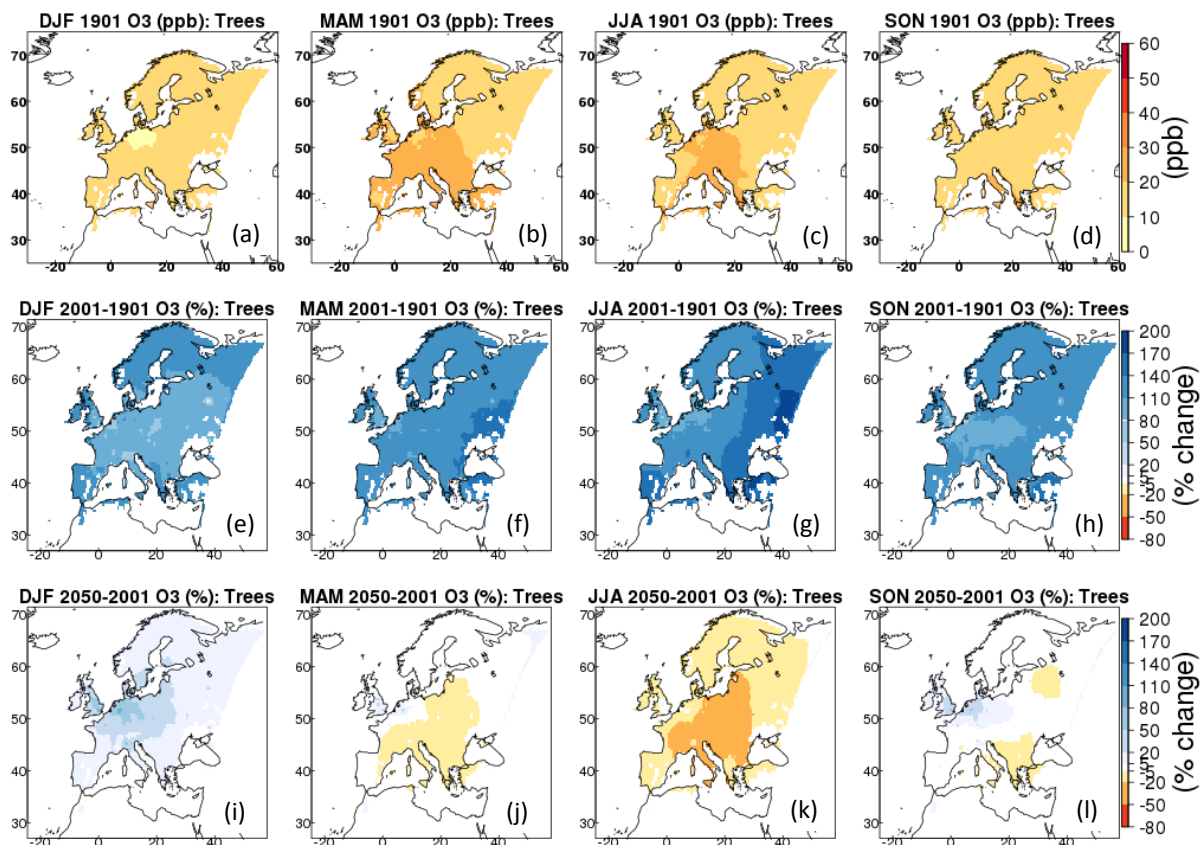

80

81 **Figure S3.** (a-d) 1901 seasonal mean (DJF, MAM, JJA, SON) O<sub>3</sub> concentration (ppb) from EMEP for woody (tree and shrub) PFTs;  
 82 (e-h) change in seasonal O<sub>3</sub> concentration (%) from 1901 to 2001; (i-l) change in seasonal O<sub>3</sub> concentration (%) from 2001 to 2050.

83

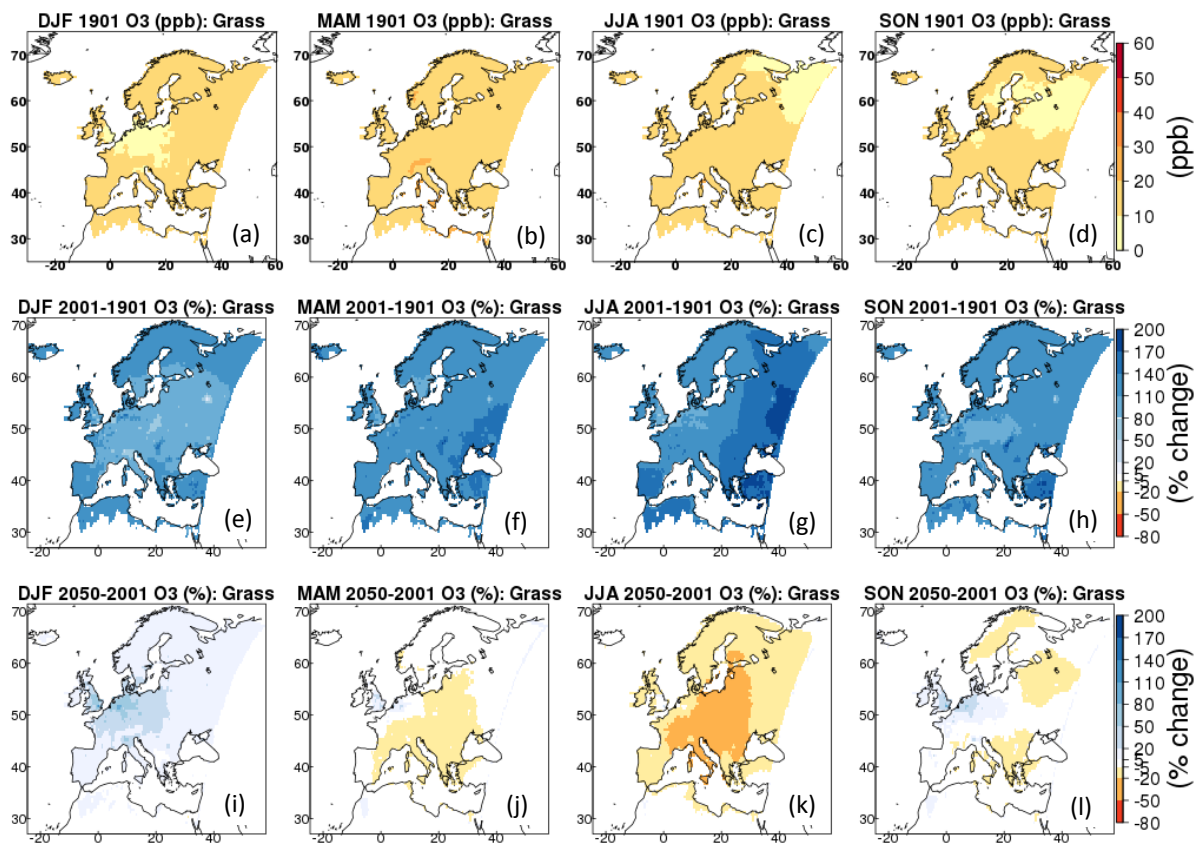

84

85 **Figure S4.** (a-d) 1901 seasonal mean (DJF, MAM, JJA, SON) O<sub>3</sub> concentration (ppb) from EMEP for herbaceous PFTs; (e-h)  
86 change in seasonal O<sub>3</sub> concentration (%) from 1901 to 2001; (i-l) change in seasonal O<sub>3</sub> concentration (%) from 2001 to 2050.

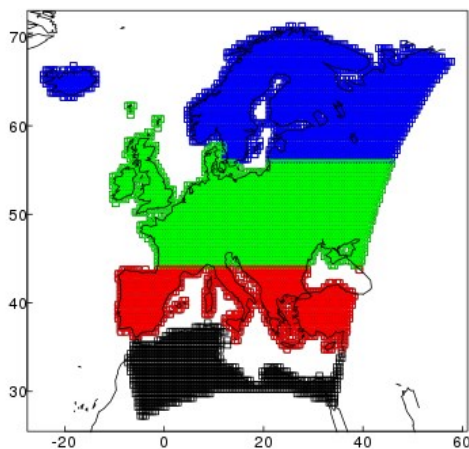

88  
89 **Figure S5.** Regions, blue is Boreal, green is Temperate, red is Mediterranean.

### 92 S3 Assessing the difference between gs model formulation

93  
94 Here we assess the impact of *g<sub>s</sub>* model formulation, comparing the standard JULES Jacobs (1994) formulation (equation 6) with  
95 the alternative Medlyn *et al.*, (2011) formulation (equation 7). This was done for two contrasting grid points (wet/dry) in central  
96 Europe with a fixed fractional cover of 20% for each PFT.

97  
98 JULES was spun-up for 20 years (1979-1999) at two grid points in central Europe representing a wet (lat: 48.25; lon.: 5.25) and a  
99 dry site (lat: 38.25; lon.: -7.75). The WFDEI meteorological forcing dataset was used (Weedon, 2013), along with atmospheric CO<sub>2</sub>  
100 concentration for the year 1999 (368.33 ppm), and either no O<sub>3</sub> (i.e. the O<sub>3</sub> damage model was switched off) for the control  
101 simulations, or spatially explicit fields of present day O<sub>3</sub> concentration produced using the UK Chemistry and Aerosol (UKCA)  
102 model from the run evaluated by O'Connor *et al.* (2014) for the simulations with O<sub>3</sub>. Following the spin-up period, JULES was run  
103 for one year (2000) with corresponding atmospheric CO<sub>2</sub> concentration, and tropospheric O<sub>3</sub> concentrations as described above. The  
104 control and ozone simulations were performed for both *g<sub>s</sub>* model formulations (Medlyn *et al.* (2011) and (Jacobs, 1994)). Land  
105 cover for the spin-up and main run was fixed at 20% for each PFT. For the simulations including O<sub>3</sub> damage, the high plant O<sub>3</sub>  
106 sensitivity parameterisation was used. The difference between these simulations was used to assess the impact of *g<sub>s</sub>* model  
107 formulation on the leaf level fluxes of carbon and water. The modelled soil moisture stress factor (fsmc) at the wet site ranged from  
108 0.8 to 1.0 over the year 2000 (1.0 indicates no soil moisture stress), and at the dry site fsmc steadily declined from 0.8 at the start of  
109 the year to 0.25 by the end of the summer.

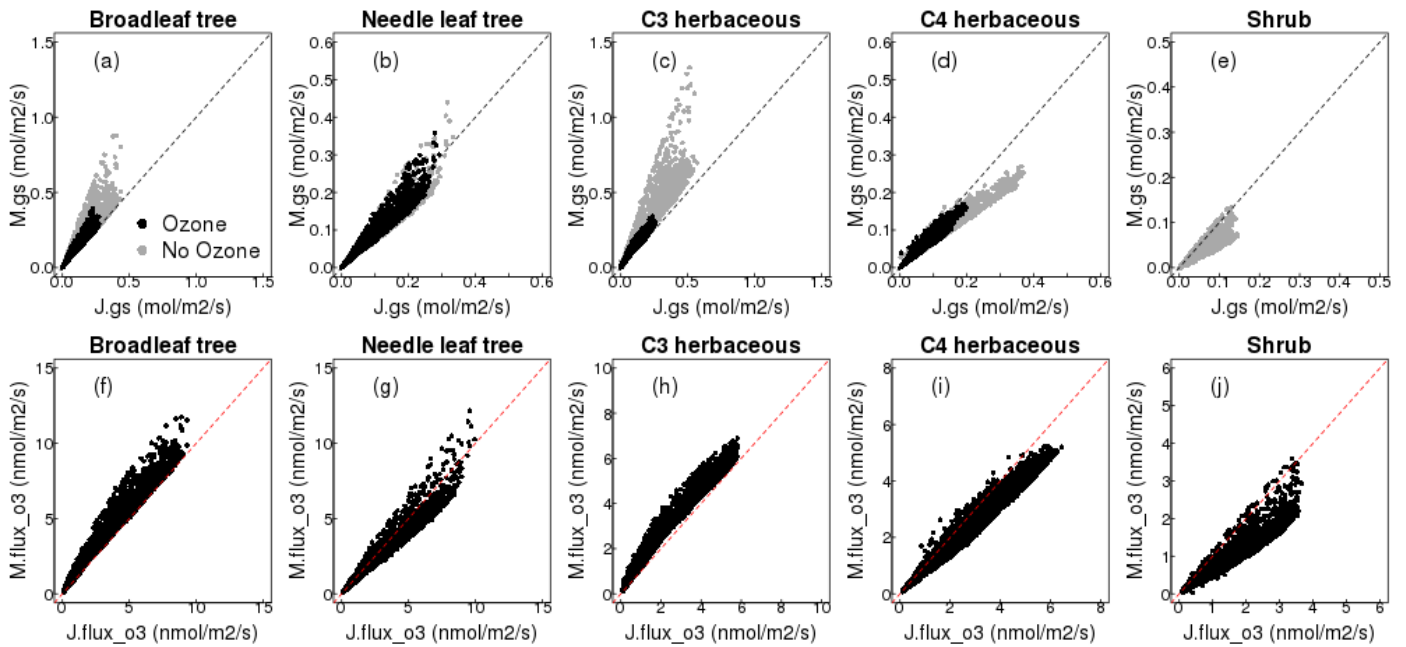

113

114

115

116

**Figure S6.** Comparison of the Medlyn *et al.*, (2011)  $g_s$  model (y axis) versus the Jacobs (1994)  $g_s$  model (x axis) currently used in JULES for all five JULES PFTs, for stomatal conductance ( $g_s$ , top row) and the flux of  $O_3$  through the stomata (flux\_o3, bottom row) for a dry site.

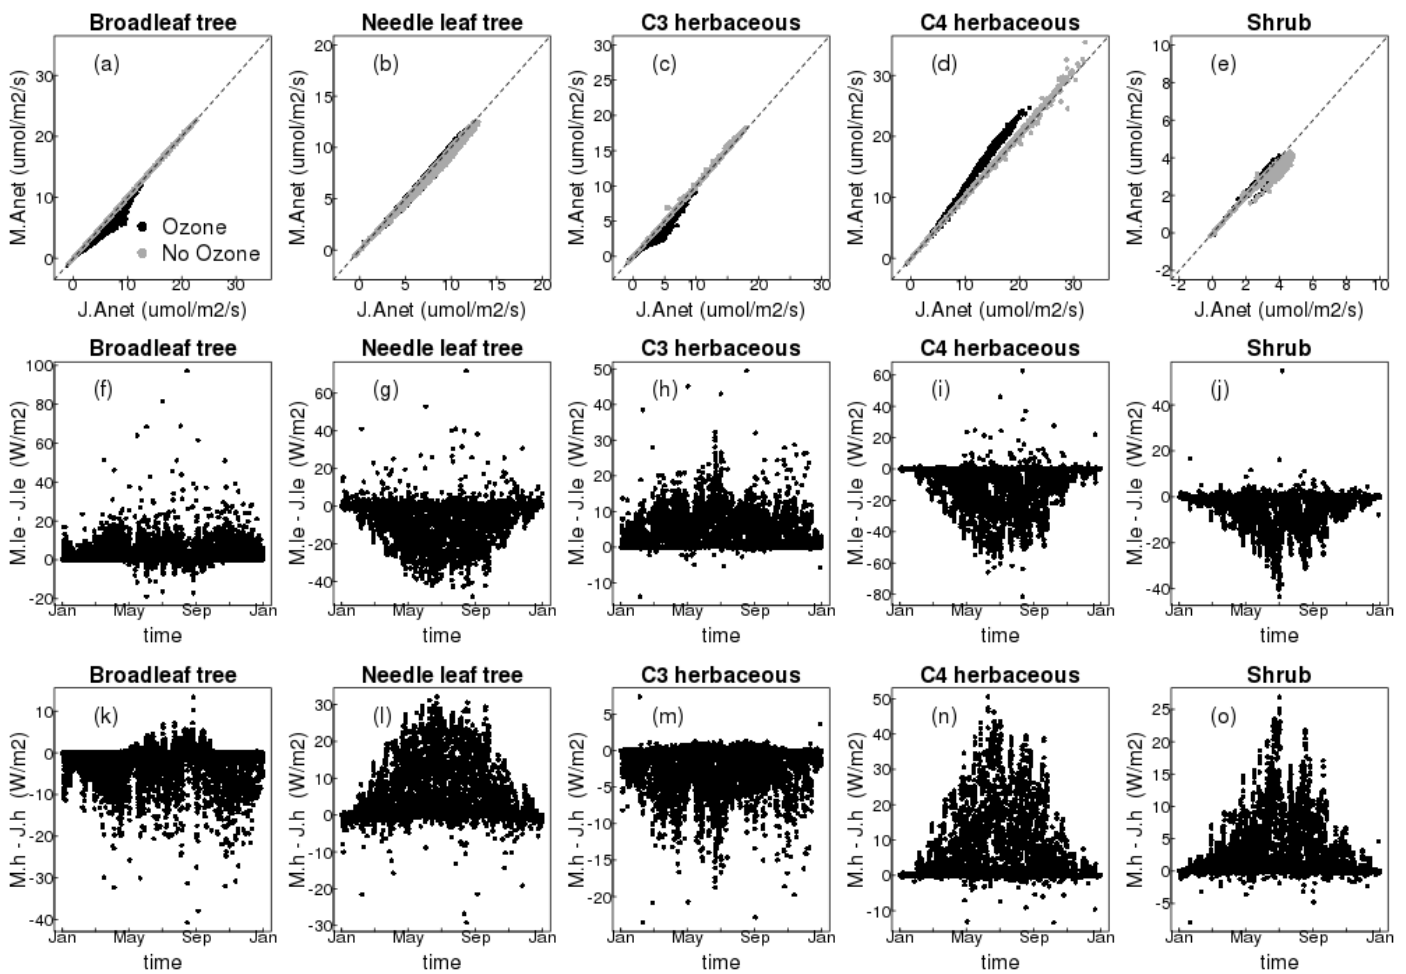

117

118

119

120

**Figure S7.** Comparison of the Medlyn *et al.*, (2011)  $g_s$  model (y axis) versus the Jacobs (1994)  $g_s$  model (x axis) currently used in JULES for all five JULES PFTs at a wet site, for net photosynthesis ( $Anet$ , top row). Residual plots (Medlyn - Jacobs) show the difference between models over the year for latent heat (le, middle row) and sensible heat (h, bottom row).

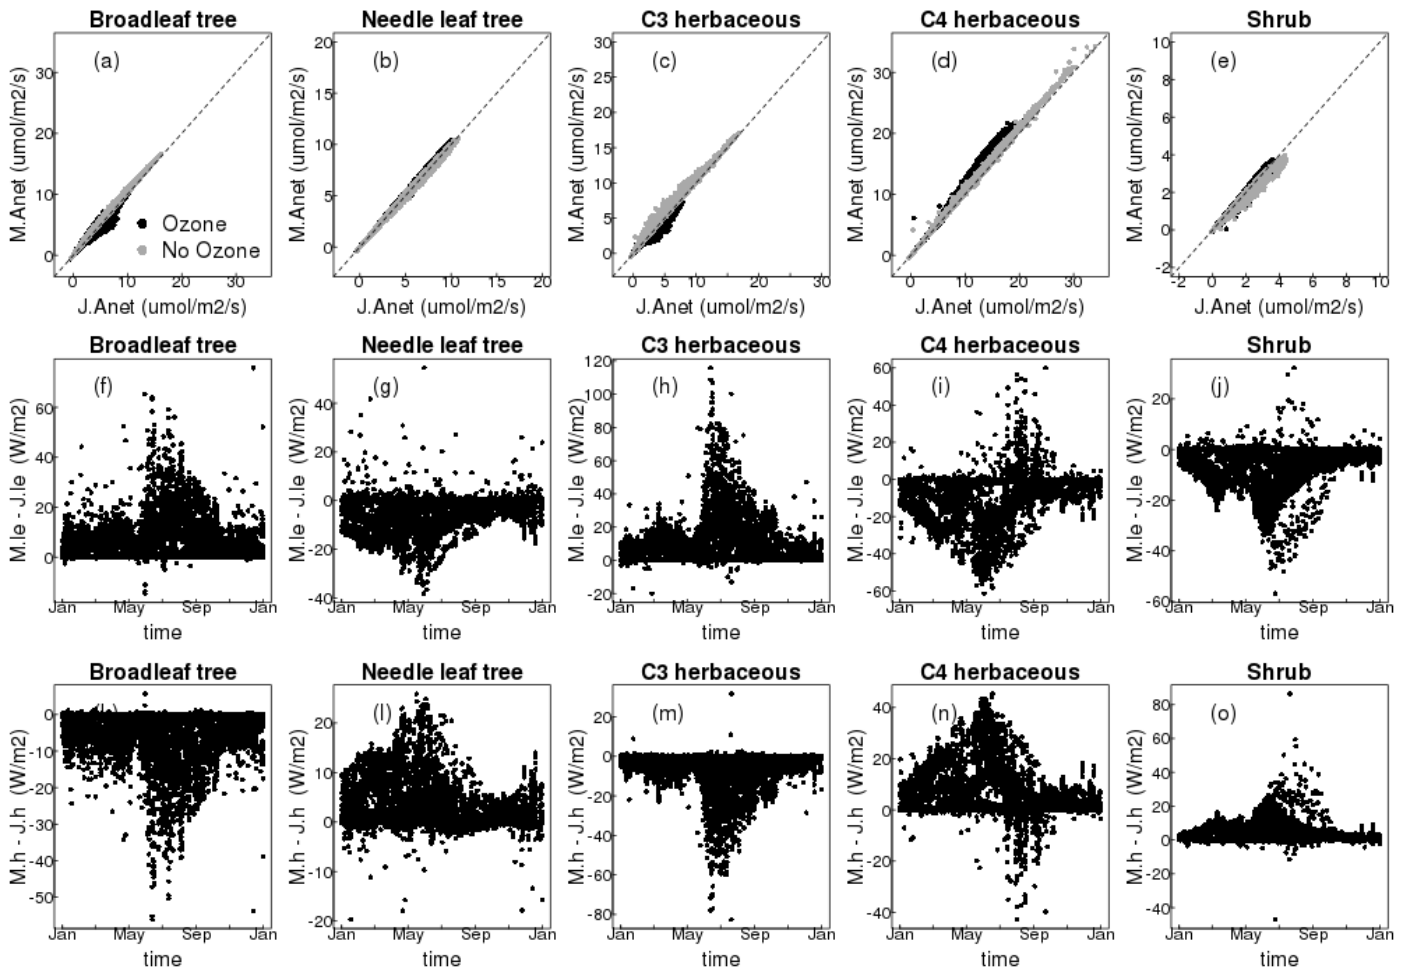

121

122

123

124

125

126

#### S4 Estimation of effects due to O<sub>3</sub>, CO<sub>2</sub> and O<sub>3</sub> with CO<sub>2</sub>

127

128

129

130

131

132

133

134

135

$$100 * (\text{var}[y_1] - \text{var}[y_2]) / \text{var}[y_2] \quad (\text{S1})$$

136

137

138

139

140

141

Where  $\text{var}[y_x]$  represents the variable in time period  $y$ , e.g.  $100 * (\text{varO}_3[2050] - \text{varO}_3[1901]) / \text{varO}_3[1901]$  gives the O<sub>3</sub> effect (at fixed CO<sub>2</sub>) over the full experimental period.

It has been suggested that elevated atmospheric CO<sub>2</sub> provides some protection against plant O<sub>3</sub> damage by reducing  $g_s$  and therefore reducing dry deposition of O<sub>3</sub> through plant stomata (Wittig et al., 2007; Ainsworth et al., 2012). We assess this protection by



142 comparing the O<sub>3</sub> effect at fixed pre-industrial CO<sub>2</sub> concentration (calculated using equation S1 e.g.  $100 * (\text{fixCO}_2\text{varO}_3[2050] -$   
 143  $\text{fixCO}_2\text{fixO}_3[2050]) / \text{fixCO}_2\text{fixO}_3[2050]$ ) with the O<sub>3</sub> effect produced when CO<sub>2</sub> concentration is increasing, calculated as  $100 *$   
 144  $(\text{varCO}_2\text{varO}_3[2050] - \text{varCO}_2\text{fixO}_3[2050]) / \text{varCO}_2\text{fixO}_3[2050]$ . Fix refers to fixed pre-industrial concentration of either gas and  
 145 var refers to time varying changes in concentration. The difference between these defines the alleviation of the O<sub>3</sub> effect by CO<sub>2</sub>.  
 146 The meteorological forcing is prescribed in these simulations and is therefore the same between the model runs. Other climate  
 147 factors, such as VPD, temperature and soil moisture availability are accounted for in our simulations, but our analysis isolates the  
 148 effects of O<sub>3</sub>, CO<sub>2</sub> and O<sub>3</sub> + CO<sub>2</sub>.

149  
150  
151

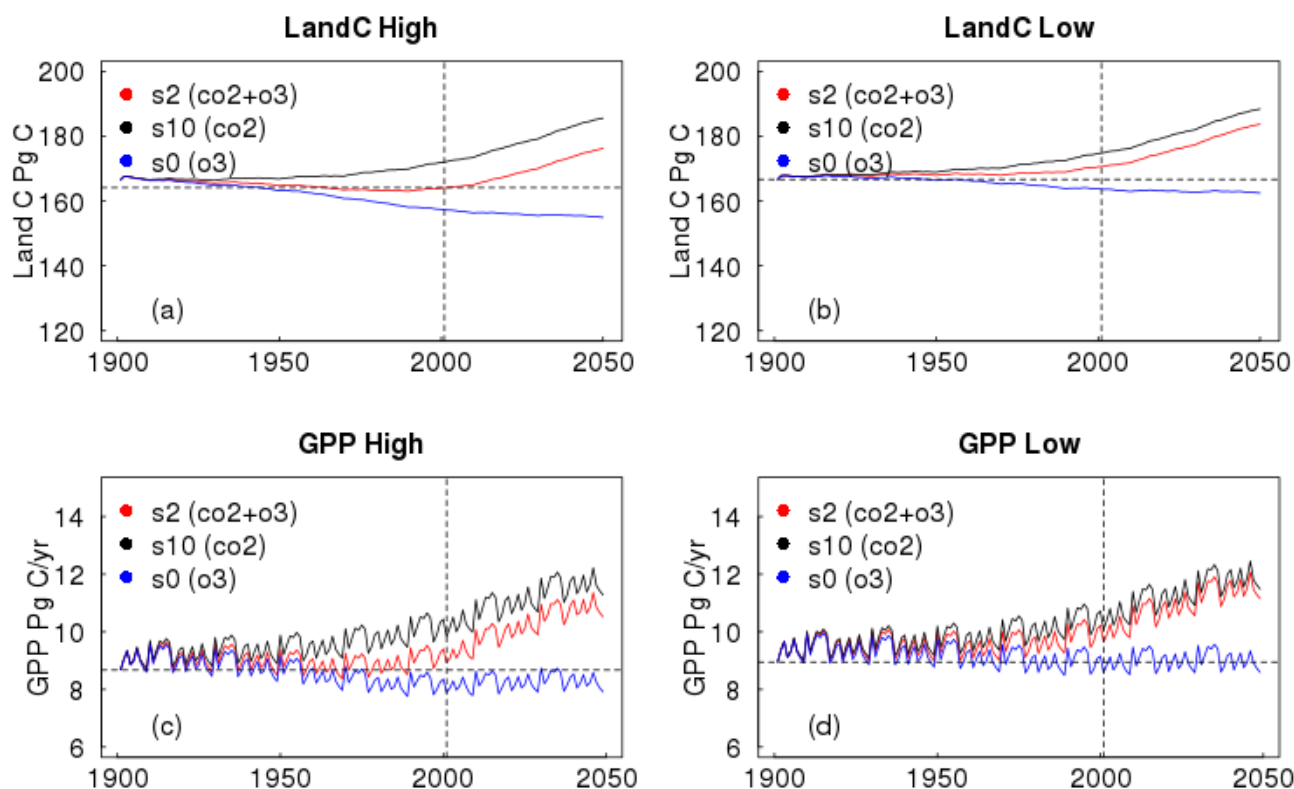

152

153 **Figure S9.** Times series (1901 to 2050) of changes in total carbon stocks (Land C) and gross primary productivity (GPP) due to O<sub>3</sub>  
 154 effects at fixed pre-industrial atmospheric CO<sub>2</sub> concentration (O<sub>3</sub>, blue), CO<sub>2</sub> effects at fixed pre-industrial O<sub>3</sub> concentration (CO<sub>2</sub>,  
 155 black), and effects of CO<sub>2</sub> and O<sub>3</sub> together (CO<sub>2</sub>+O<sub>3</sub>, red), for the higher and lower plant O<sub>3</sub> sensitivity. The horizontal dashed line  
 156 shows the pre-industrial value, and the vertical dashed line marks the year 2001.

157

158

159

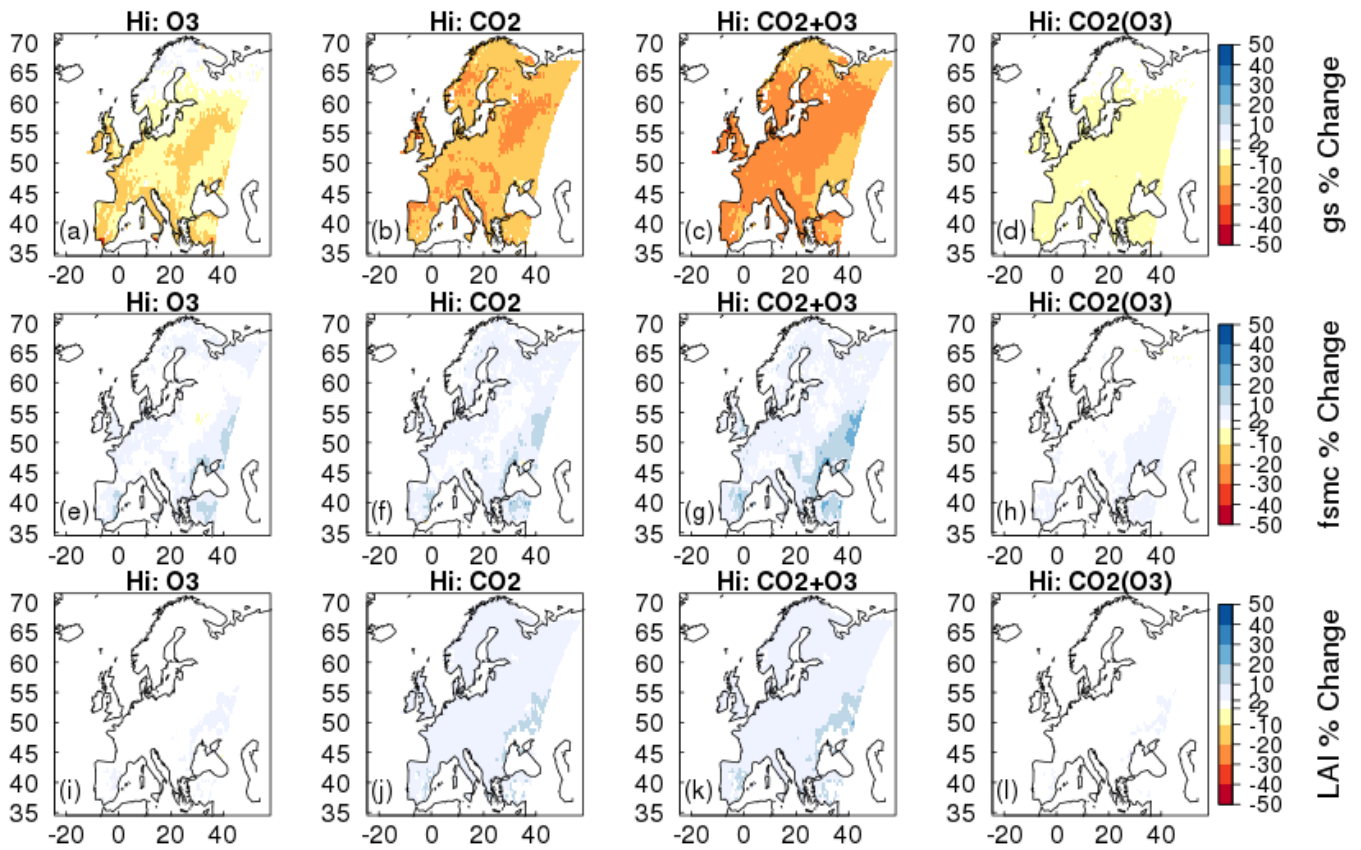

160

161 **Figure S10.** Simulated percentage change in stomatal conductance (gs) a-c), soil moisture availability factor (fsmc) d-e) and leaf  
 162 area index (LAI) g-i) due to O<sub>3</sub> effects at fixed pre-industrial atmospheric CO<sub>2</sub> concentration (O<sub>3</sub>), CO<sub>2</sub> effects at fixed pre-industrial  
 163 O<sub>3</sub> concentration (CO<sub>2</sub>), and effects of CO<sub>2</sub> and O<sub>3</sub> changing simultaneously (CO<sub>2</sub>+O<sub>3</sub>). Changes are shown for the periods 1901  
 164 to 2050 for the higher plant O<sub>3</sub> sensitivity.

165

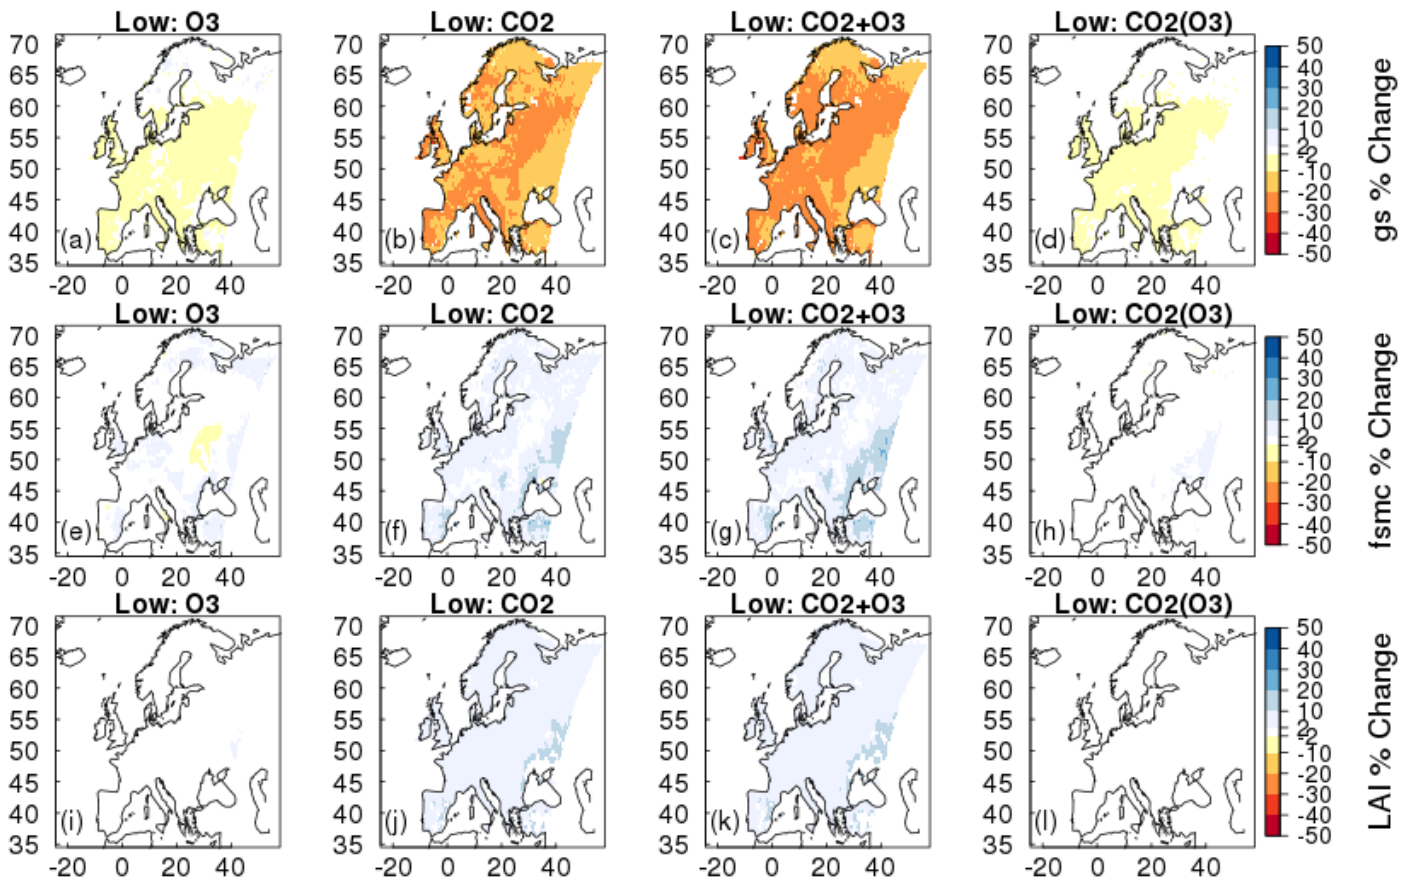

**Figure S11.** Simulated percentage change in stomatal conductance (gs) a-c), soil moisture availability factor (fsmc) d-e) and leaf area index (*LAI*) g-i) due to O<sub>3</sub> effects at fixed pre-industrial atmospheric CO<sub>2</sub> concentration (O<sub>3</sub>), CO<sub>2</sub> effects at fixed pre-industrial O<sub>3</sub> concentration (CO<sub>2</sub>), and effects of CO<sub>2</sub> and O<sub>3</sub> changing simultaneously (CO<sub>2</sub>+O<sub>3</sub>). Changes are shown for the periods 1901 to 2050 for the lower plant O<sub>3</sub> sensitivity.

185

186

| Future run, constant climate (1901 - 2001) |                                 |                                 |                |                 |                  |                  |
|--------------------------------------------|---------------------------------|---------------------------------|----------------|-----------------|------------------|------------------|
| Hi Sensitivity                             |                                 |                                 |                |                 |                  |                  |
|                                            | GPP<br>(Pg C yr <sup>-1</sup> ) | NPP<br>(Pg C yr <sup>-1</sup> ) | $g_s$<br>(m/s) | Veg C<br>(Pg C) | Soil C<br>(Pg C) | Land C<br>(Pg C) |
| Value in 1901:                             | 9.05                            | 4.46                            | 0.03228        | 41.1            | 125.8            | 167              |
| Absolute diff. (2001 - 1901):              |                                 |                                 |                |                 |                  |                  |
| <b>O<sub>3</sub></b>                       | -0.81                           | -0.47                           | 0.00           | -0.02           | -9.09            | -9.21            |
| <b>CO<sub>2</sub></b>                      | 1.16                            | 0.76                            | 0.00           | 2.82            | 1.52             | 4.24             |
| <b>CO<sub>2</sub> + O<sub>3</sub></b>      | 0.13                            | 0.12                            | 0.00           | 2.37            | -5.55            | -3.28            |
| Relative diff. (%)                         | (%)                             | (%)                             | (%)            | (%)             | (%)              | (%)              |
| <b>O<sub>3</sub></b>                       | -8.95                           | -10.54                          | -8.55          | -0.05           | -7.23            | -5.51            |
| <b>CO<sub>2</sub></b>                      | 12.82                           | 17.04                           | -6.07          | 6.86            | 1.21             | 2.54             |
| <b>CO<sub>2</sub> + O<sub>3</sub></b>      | 1.44                            | 2.69                            | -13.66         | 5.77            | -4.41            | -1.96            |
| Lower Sensitivity                          |                                 |                                 |                |                 |                  |                  |
|                                            | GPP<br>(Pg C yr <sup>-1</sup> ) | NPP<br>(Pg C yr <sup>-1</sup> ) | $g_s$<br>(m/s) | Veg C<br>(Pg C) | Soil C<br>(Pg C) | Land C<br>(Pg C) |
| Value in 1901:                             | 9.34                            | 4.65                            | 0.03319        | 41.1            | 126.4            | 167.5            |
| Absolute diff. (2001 - 1901):              |                                 |                                 |                |                 |                  |                  |
| <b>O<sub>3</sub></b>                       | -0.30                           | -0.21                           | 0.00           | -0.21           | -3.38            | -3.59            |
| <b>CO<sub>2</sub></b>                      | 1.15                            | 0.74                            | 0.00           | 2.73            | 3.70             | 6.43             |
| <b>CO<sub>2</sub> + O<sub>3</sub></b>      | 0.65                            | 0.43                            | 0.00           | 2.21            | 0.29             | 2.50             |
| Relative diff. (%)                         | (%)                             | (%)                             | (%)            | (%)             | (%)              | (%)              |
| <b>O<sub>3</sub></b>                       | -3.21                           | -4.52                           | -3.31          | -0.51           | -2.67            | -2.14            |
| <b>CO<sub>2</sub></b>                      | 12.31                           | 15.91                           | -6.39          | 6.64            | 2.93             | 3.84             |
| <b>CO<sub>2</sub> + O<sub>3</sub></b>      | 6.96                            | 9.25                            | -9.88          | 5.38            | 0.23             | 1.49             |

187

188 **Table S2.** Simulated changes in the European land carbon cycle due to changing O<sub>3</sub> and CO<sub>2</sub> concentrations. Shown are changes in  
189 total carbon stocks (Land C), split into vegetation (Veg C) and soil (Soil C) carbon, and gross primary productivity (GPP), net  
190 primary productivity (NPP) and conductance ( $g_s$ ), between 1901 and 2001.

191

192

193

194

195

196

197

198

| <b>Future run, constant climate (2001 - 2050)</b> |                                 |                                 |                |                 |                  |                  |
|---------------------------------------------------|---------------------------------|---------------------------------|----------------|-----------------|------------------|------------------|
| <b>Hi Sensitivity</b>                             |                                 |                                 |                |                 |                  |                  |
|                                                   | GPP<br>(Pg C yr <sup>-1</sup> ) | NPP<br>(Pg C yr <sup>-1</sup> ) | $g_s$<br>(m/s) | Veg C<br>(Pg C) | Soil C<br>(Pg C) | Land C<br>(Pg C) |
| Value in 2001:                                    |                                 |                                 |                |                 |                  |                  |
| <b>O<sub>3</sub></b>                              | 8.24                            | 3.99                            | 0.02952        | 41.08           | 116.71           | 157.79           |
| <b>CO<sub>2</sub></b>                             | 10.21                           | 5.22                            | 0.03032        | 43.92           | 127.32           | 171.24           |
| <b>CO<sub>2</sub> + O<sub>3</sub></b>             | 9.18                            | 4.58                            | 0.02787        | 43.47           | 120.25           | 163.72           |
| Absolute diff. (2050 - 2001):                     |                                 |                                 |                |                 |                  |                  |
| <b>O<sub>3</sub></b>                              | 0.01                            | 0.00                            | 0.00           | -0.09           | -2.35            | -2.44            |
| <b>CO<sub>2</sub></b>                             | 1.42                            | 0.95                            | 0.00           | 5.25            | 7.73             | 12.98            |
| <b>CO<sub>2</sub> + O<sub>3</sub></b>             | 1.66                            | 1.07                            | 0.00           | 5.11            | 6.00             | 11.11            |
| Relative diff. (%)                                |                                 |                                 |                |                 |                  |                  |
| <b>O<sub>3</sub></b>                              | 0.12                            | 0.00                            | 0.00           | -0.22           | -2.01            | -1.55            |
| <b>CO<sub>2</sub></b>                             | 13.91                           | 18.20                           | -13.89         | 11.95           | 6.07             | 7.58             |
| <b>CO<sub>2</sub> + O<sub>3</sub></b>             | 18.08                           | 23.36                           | -11.37         | 11.76           | 4.99             | 6.79             |
| <b>Lower Sensitivity</b>                          |                                 |                                 |                |                 |                  |                  |
|                                                   | GPP<br>(Pg C yr <sup>-1</sup> ) | NPP<br>(Pg C yr <sup>-1</sup> ) | $g_s$<br>(m/s) | Veg C<br>(Pg C) | Soil C<br>(Pg C) | Land C<br>(Pg C) |
| Value in 2001:                                    |                                 |                                 |                |                 |                  |                  |
| <b>O<sub>3</sub></b>                              | 9.04                            | 4.44                            | 0.03           | 40.89           | 123.02           | 163.91           |
| <b>CO<sub>2</sub></b>                             | 10.49                           | 5.39                            | 0.03           | 43.83           | 130.1            | 173.93           |
| <b>CO<sub>2</sub> + O<sub>3</sub></b>             | 9.99                            | 5.08                            | 0.02991        | 43.31           | 126.69           | 170              |
| Absolute diff. (2050 - 2001):                     |                                 |                                 |                |                 |                  |                  |
| <b>O<sub>3</sub></b>                              | 0.02                            | -0.06                           | 0.00           | -0.13           | -0.94            | -1.07            |
| <b>CO<sub>2</sub></b>                             | 1.35                            | 0.92                            | 0.00           | 5.25            | 7.89             | 13.14            |
| <b>CO<sub>2</sub> + O<sub>3</sub></b>             | 1.50                            | 1.00                            | 0.00           | 5.11            | 7.25             | 12.35            |
| Relative diff. (%)                                |                                 |                                 |                |                 |                  |                  |
| <b>O<sub>3</sub></b>                              | 0.22                            | -1.35                           | -0.72          | -0.32           | -0.76            | -0.65            |
| <b>CO<sub>2</sub></b>                             | 12.87                           | 17.07                           | -14.64         | 11.98           | 6.06             | 7.55             |
| <b>CO<sub>2</sub> + O<sub>3</sub></b>             | 15.02                           | 19.69                           | -13.37         | 11.80           | 5.72             | 7.26             |

**Table S3.** Simulated changes in the European land carbon cycle due to changing O<sub>3</sub> and CO<sub>2</sub> concentrations. Shown are changes in total carbon stocks (Land C), split into vegetation (Veg C) and soil (Soil C) carbon, and gross primary productivity (GPP), net primary productivity (NPP) and conductance ( $g_s$ ), between 2001 and 2050.

| Future run, constant climate (1901 - 2050) |                                 |                                 |                |                 |                  |                  |
|--------------------------------------------|---------------------------------|---------------------------------|----------------|-----------------|------------------|------------------|
| Hi Sensitivity                             |                                 |                                 |                |                 |                  |                  |
|                                            | GPP<br>(Pg C yr <sup>-1</sup> ) | NPP<br>(Pg C yr <sup>-1</sup> ) | $g_s$<br>(m/s) | Veg C<br>(Pg C) | Soil C<br>(Pg C) | Land C<br>(Pg C) |
| Value in 1901:                             | 9.05                            | 4.46                            | 0.03228        | 41.1            | 125.8            | 167              |
| Absolute diff. (2050 - 1901):              |                                 |                                 |                |                 |                  |                  |
| <b>O<sub>3</sub></b>                       | -0.80                           | -0.47                           | 0.00           | -0.11           | -11.44           | -11.65           |
| <b>CO<sub>2</sub></b>                      | 2.58                            | 1.71                            | -0.01          | 8.07            | 9.25             | 17.22            |
| <b>CO<sub>2</sub> + O<sub>3</sub></b>      | 1.79                            | 1.19                            | -0.01          | 7.48            | 0.45             | 7.83             |
| Relative diff. (%)                         | (%)                             | (%)                             | (%)            | (%)             | (%)              | (%)              |
| <b>O<sub>3</sub></b>                       | -8.84                           | -10.54                          | -8.55          | -0.27           | -9.09            | -6.98            |
| <b>CO<sub>2</sub></b>                      | 28.51                           | 38.34                           | -19.11         | 19.64           | 7.35             | 10.31            |
| <b>CO<sub>2</sub> + O<sub>3</sub></b>      | 19.78                           | 26.68                           | -23.48         | 18.20           | 0.36             | 4.69             |
| Lower Sensitivity                          |                                 |                                 |                |                 |                  |                  |
|                                            | GPP<br>(Pg C yr <sup>-1</sup> ) | NPP<br>(Pg C yr <sup>-1</sup> ) | $g_s$<br>(m/s) | Veg C<br>(Pg C) | Soil C<br>(Pg C) | Land C<br>(Pg C) |
| Value in 1901:                             | 9.34                            | 4.65                            | 0.03319        | 41.1            | 126.4            | 167.5            |
| Absolute diff. (2050 - 1901):              |                                 |                                 |                |                 |                  |                  |
| <b>O<sub>3</sub></b>                       | -0.40                           | -0.27                           | 0.00           | -0.34           | -4.32            | -4.66            |
| <b>CO<sub>2</sub></b>                      | 2.50                            | 1.66                            | -0.01          | 7.98            | 11.59            | 19.57            |
| <b>CO<sub>2</sub> + O<sub>3</sub></b>      | 2.15                            | 1.43                            | -0.01          | 7.32            | 7.54             | 14.85            |
| Relative diff. (%)                         | (%)                             | (%)                             | (%)            | (%)             | (%)              | (%)              |
| <b>O<sub>3</sub></b>                       | -4.28                           | -5.81                           | -4.01          | -0.83           | -3.42            | -2.78            |
| <b>CO<sub>2</sub></b>                      | 26.77                           | 35.70                           | -20.10         | 19.42           | 9.17             | 11.68            |
| <b>CO<sub>2</sub> + O<sub>3</sub></b>      | 23.02                           | 30.75                           | -21.93         | 17.81           | 5.97             | 8.87             |

211

212 **Table S4.** Simulated changes in the European land carbon cycle due to changing O<sub>3</sub> and CO<sub>2</sub> concentrations. Shown are changes in  
213 total carbon stocks (Land C), split into vegetation (Veg C) and soil (Soil C) carbon, and gross primary productivity (GPP), net  
214 primary productivity (NPP) and conductance ( $g_s$ ), between 1901 and 2050.

215

216

217

218

219

220

221

222

223

|                                                                      | GPP_hi<br>(Pg C yr <sup>-1</sup> ) | GPP_low<br>(Pg C yr <sup>-1</sup> ) | LandC_hi<br>(Pg C) | LandC_low<br>(Pg C) |
|----------------------------------------------------------------------|------------------------------------|-------------------------------------|--------------------|---------------------|
| Value in 1901:                                                       | 9.05                               | 9.34                                | 167.00             | 167.50              |
| Value in 2050:                                                       |                                    |                                     |                    |                     |
| <b>CO<sub>2</sub></b>                                                | 11.63                              | 11.84                               | 184.22             | 187.07              |
| <b>O<sub>3</sub></b>                                                 | 8.25                               | 8.94                                | 155.35             | 162.84              |
| <b>CO<sub>2</sub> + O<sub>3</sub></b>                                | 10.84                              | 11.49                               | 174.83             | 182.35              |
| % change due to O <sub>3</sub> at PI CO <sub>2</sub>                 | -8.84                              | -4.28                               | -6.98              | -2.78               |
| % change due to O <sub>3</sub> at high CO <sub>2</sub>               | -6.79                              | -2.96                               | -5.10              | -2.52               |
| Alleviation of O <sub>3</sub> damage by CO <sub>2</sub> increase (%) | 2.05                               | 1.33                                | 1.88               | 0.26                |

224

225 **Table S5.** Percentage reduction in simulated GPP and Land C by 2050 due to future O<sub>3</sub> effects at pre-industrial (PI) CO<sub>2</sub>  
226 concentration, and under increasing future CO<sub>2</sub> concentration. The difference between these defines the alleviation of the O<sub>3</sub> effect  
227 by CO<sub>2</sub>.

228

229

230

231

232

233

234

235

236

237

238

239

240

241

242 **References**

- 244 Ainsworth, E. A., Yendrek, C. R., Sitch, S., Collins, W. J., and Emberson, L. D.: The Effects of Tropospheric Ozone on Net  
245 Primary Productivity and Implications for Climate Change, *Annual Review of Plant Biology*, 63, 637-661, doi:10.1146/annurev-  
246 arplant-042110-103829, 2012.
- 247 Büker, P., Feng, Z., Uddling, J., Briolat, A., Alonso, R., Braun, S., Elvira, S., Gerosa, G., Karlsson, P. E., Le Thiec, D., Marzuoli,  
248 R., Mills, G., Oksanen, E., Wieser, G., Wilkinson, M., and Emberson, L. D.: New flux based dose-response relationships for  
249 ozone for European forest tree species, *Environmental Pollution*, 163-174, 2015.
- 250 CLRTAP: The UNECE Convention on Long-range Transboundary Air Pollution. Manual on Methodologies and Criteria for  
251 Modelling and Mapping Critical Loads and Levels and Air Pollution Effects, Risks and Trends: Chapter III Mapping Critical  
252 Levels for Vegetation, accessed via, [http://icpvegetation.ceh.ac.uk/publications/documents/Chapter3-  
253 Mappingcriticallevelsforvegetation\\_000.pdf](http://icpvegetation.ceh.ac.uk/publications/documents/Chapter3-Mappingcriticallevelsforvegetation_000.pdf), 2017.
- 254 IGBP-DIS: International Geosphere-Biosphere Programme, Data and Information System, Potsdam, Germany. Available from  
255 Oak Ridge National Laboratory Distributed Active Archive Center, Oak Ridge, TN, available at: <http://www.daac.ornl.gov>,  
256 Jacobs, C. M. J.: Direct impact of atmospheric CO<sub>2</sub> enrichment on regional transpiration, Wageningen Agricultural University,  
257 1994.
- 258 Karlsson, P. E., Braun, S., Broadmeadow, M., Elvira, S., Emberson, L., Gimeno, B. S., Le Thiec, D., Novak, K., Oksanen, E.,  
259 Schaub, M., Uddling, J., and Wilkinson, M.: Risk assessments for forest trees: The performance of the ozone flux versus the AOT  
260 concepts, *Environmental Pollution*, 146, 608-616, <http://dx.doi.org/10.1016/j.envpol.2006.06.012>, 2007.
- 261 Medlyn, B. E., Duursma, R. A., Eamus, D., Ellsworth, D. S., Prentice, I. C., Barton, C. V., Crous, K. Y., de Angelis, P., Freeman,  
262 M., and Wingate, L.: Reconciling the optimal and empirical approaches to modelling stomatal conductance, *Global Change  
263 Biology*, 17, 2134-2144, 2011.
- 264 O'Connor, F. M., Johnson, C. E., Morgenstern, O., Abraham, N. L., Braesicke, P., Dalvi, M., Folberth, G. A., Sanderson, M. G.,  
265 Telford, P. J., Voulgarakis, A., Young, P. J., Zeng, G., Collins, W. J., and Pyle, J. A.: Evaluation of the new UKCA climate-  
266 composition model – Part 2: The Troposphere, *Geosci. Model Dev.*, 7, 41-91, 10.5194/gmd-7-41-2014, 2014.
- 267 Tans, P., and Keeling, R.: Dr. Pieter Tans, NOAA/ESRL ([www.esrl.noaa.gov/gmd/ccgg/trends/](http://www.esrl.noaa.gov/gmd/ccgg/trends/)) and Dr. Ralph Keeling, Scripps  
268 Institution of Oceanography ([scrippsco2.ucsd.edu/](http://scrippsco2.ucsd.edu/)).
- 269 Weedon, G. P.: Readme file for the "WFDEI" dataset.available at: [http://www.eu-watch.org/gfx\\_content/documents/README-  
270 WFDEI.pdf](http://www.eu-watch.org/gfx_content/documents/README-WFDEI.pdf), 2013.
- 271 Wittig, V. E., Ainsworth, E. A., and Long, S. P.: To what extent do current and projected increases in surface ozone affect  
272 photosynthesis and stomatal conductance of trees? A meta-analytic review of the last 3 decades of experiments, *Plant, Cell &  
273 Environment*, 30, 1150-1162, 10.1111/j.1365-3040.2007.01717.x, 2007.
